# Supplementary material
Source: publisher figshare collection journal article supplement (https://tandf.figshare.com/articles/dataset/_/7756820)
Supplement: Supplementary file 1 [file 2]

# Supplementary Materials

## 1 Simulation study S1

We conduct two experiments as described in Kolde et al. (Robust rank aggregation for gene list integration and meta-analysis, Bioinformatics, 2012). All ranking lists consisted of 1000 items out of which 5% were preferentially ranked at the top. We regard the top 50 items as the informative items and the remaining as the noised items. The means of the informative items are sampled from the exponential distribution with scale 1/2, and means of all the noised items are 0. We randomly draw the value for each item from normal distribution with mean as specified and unit variance, and then rank the items according to the sample values. We compared five rank aggregation methods: Mean, Median, RRA, BIRRA, MM and EMM, in the following two experiments. Each experiment is replicated for 100 times.

In the first experiment, we generated 10 such top-50 ranking lists. As seen from the receiver operating characteristic (ROC) curves in Figure 1 (a), all five methods performed similarly well. Their Area Under Curve (AUC) scores were  $0.903 \pm 0.029$  (Mean),  $0.768 \pm 0.036$  (Median),  $0.681 \pm 0.045$  (RRA),  $0.871 \pm 0.035$  (BIRRA),  $0.904 \pm 0.029$  (MM) and  $0.903 \pm 0.029$  (EMM).

In the second experiment, we studied the robustness of the algorithms against noise. We generated 10 top-50 rankings lists as described before and 30 randomly ordered top-50 ranking lists. In this case, their performance varied, as shown in Figure 1 (b). Their AUC scores were  $0.817 \pm 0.031$  (Mean),  $0.501 \pm 0.043$  (Median),  $0.627 \pm 0.037$  (RRA),  $0.802 \pm 0.037$  (BIRRA),

$0.819 \pm 0.031$  (MM) and  $0.849 \pm 0.032$  (EMM).

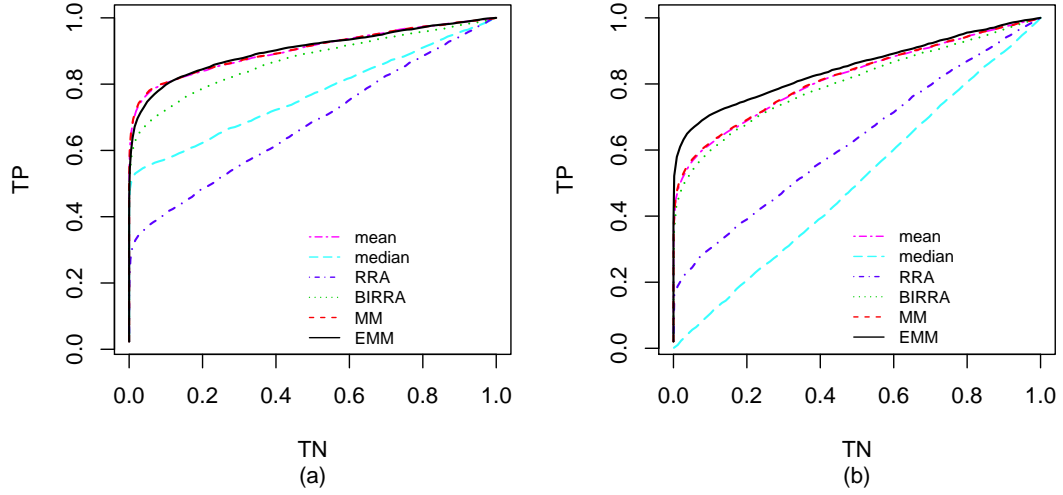

Figure 1: ROC curves from Simulation study S1. The vertical axis shows the true positive rate. The horizontal axis shows the false positive rate.

From the above two experiments, we can see that compared with other approaches, the average rank, BIRRA, MM and EMM had more robust performance in those scenarios. In the second experiment, when there are multiple noisy ranking lists, EMM performed better than other methods.

## 2 Simulation study S2

In this simulation study, we consider the scenarios that  $\phi_i$  does not follow  $\phi(1 - \alpha^i)$  as assumed in the main text, but it is either constant, linear or bell-shaped, as shown in Figure 2. When  $\phi_i \sim \text{dbeta}^*(a, b)$ , it means that  $\phi_i \propto f(\frac{i}{30})$ , where  $f(\cdot)$  is the probability density function of the beta(a, b) distribution. In all three cases, the mean of  $\phi_i$  is 0.5.

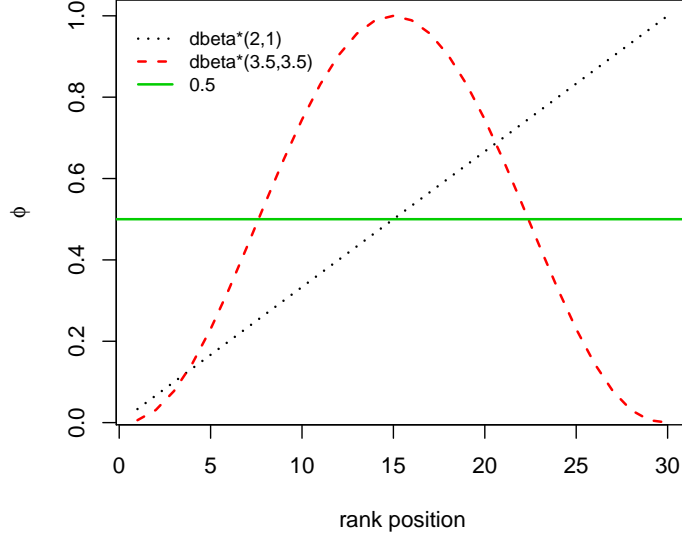

Figure 2: Different function forms of  $\phi_i$  in Simulation study S2.

Let  $U = \{1, 2, \dots, 100\}$  and  $\boldsymbol{\pi}_0 = (1, 2, \dots, 100)$ . We independently generated  $m$  top-30 ranking lists from the following model (Equation 1). We assume the quality of ranking lists vary and sample  $\omega_l$  from  $Unif(0.6, 1)$  with probability 0.5; otherwise, we sample it from  $Unif(0, 0.6)$ . We gen-

erated a couple of top-30 datasets by setting  $m = 4, 10, 20$ . Under each simulation setting, we generated 100 synthetic data sets and reported the mean of the Kendall tau distance at different rank positions. The results are summarized in Figure 3. We can see that EMM outperformed the alternatives with a smaller Kendall tau distance at different positions in those cases, showing that EMM is quite robust for aggregating ranking lists of varying quality, though  $\phi_i$  is not the same as assumed in the main text. When the number of ranking lists became larger, the performance of all of the methods improved.

$$\begin{aligned}
p(\boldsymbol{\pi}_1, \dots, \boldsymbol{\pi}_m | \boldsymbol{\pi}_0, \phi, \alpha, \omega) &= \prod_{l=1}^m \prod_{i=1}^{30} p(V_i(\boldsymbol{\pi}_l, \boldsymbol{\pi}_0) = v_i | \phi, \alpha, \omega) \\
&= \prod_{l=1}^m \prod_{i=1}^{30} \left\{ \omega_l \frac{\phi_i^{v_{li}}}{Z(\phi_i, i)} + (1 - \omega_l) \frac{1}{n - i + 1} \right\}, \\
0 &< \omega_l < 1, \quad l = 1, 2, \dots, m.
\end{aligned} \tag{1}$$

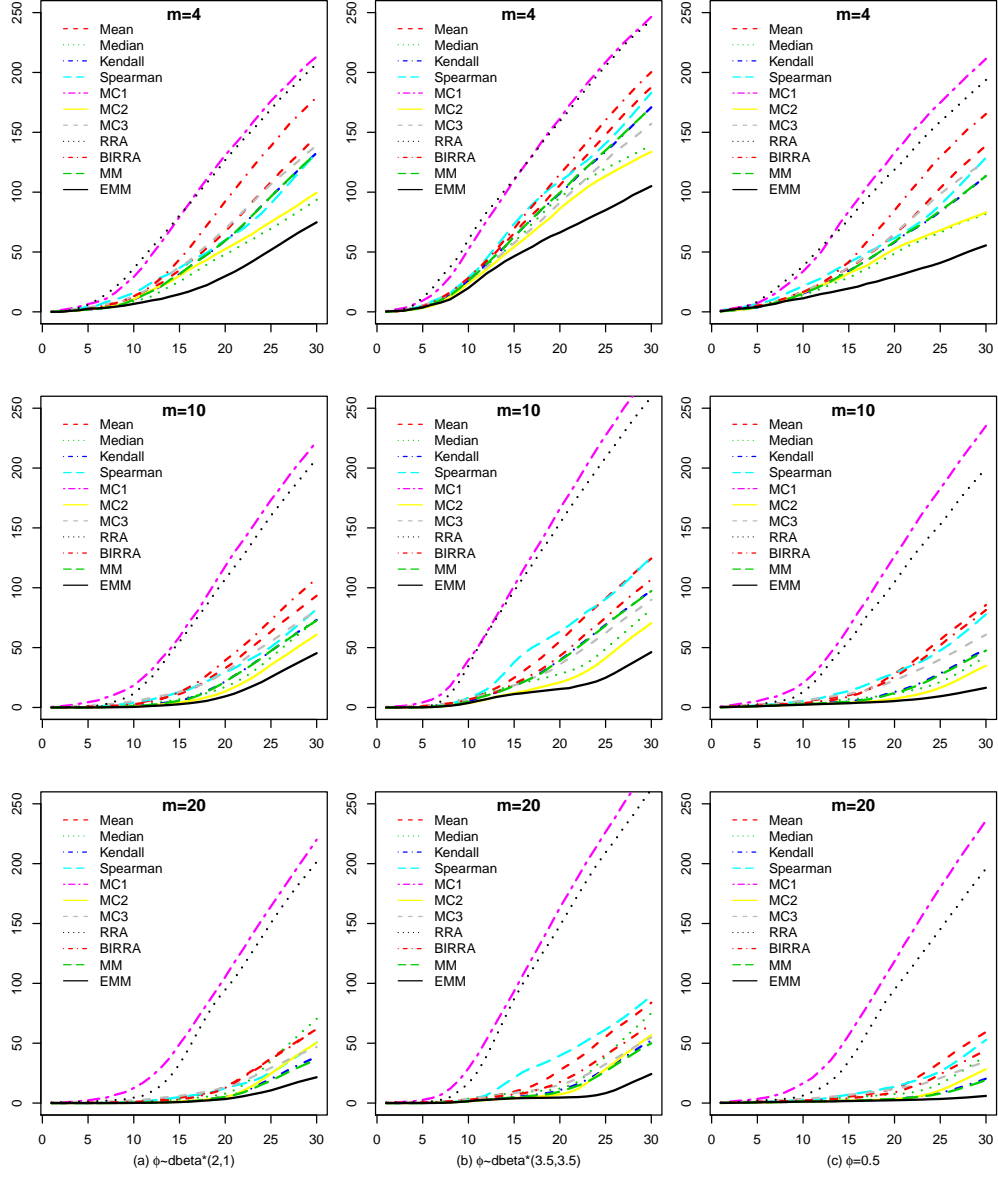

Figure 3: Stagewise Kendall tau distance of consensus rankings in Simulation study S2.

### 3 An extra real application: aggregating NBA team rankings

This example is about aggregating the multiple rankings of NBA teams and was studied by Deng et al. (Bayesian aggregation of order-based rank data, Journal of the American Statistical Association, 2014). They collected 34 rankings, including 6 professional rankings and 28 amateur rankings, for the 30 NBA teams in the 2011-2012 season. The professional rankings were obtained from six professional news agencies, such as NBA.com and ESPN.com. The amateur rankings were given by the Harvard graduate students, who were asked to select the best eight NBA teams of this season. The students classified themselves into one of the four groups in the survey: (1) avid fans, (2) fans, (3) infrequent watchers, and (4) non-interested individuals. In Table 1, the first 16 teams entered the 2011-2012 playoffs. Assuming we do not know any prior information about the quality of the rankings, we aim to predict the teams that entered the final and evaluate the quality and stability of the individual rankings.

We first evaluated the correlation amongst the 34 rankings, and their rank coefficients are shown in Figure 4. The rank coefficients of the paired rankings are calculated up to the eighth ranking stage. We can see that the professional rankings were detected as highly correlated. We applied both EMM and HEMM to fit the data, and the aggregated ranking lists produced by different methods are shown in Table 2. We can see that both EMM and HEMM exhibited a quite satisfactory performance in predicting the top 16 teams that would make the playoffs, while making just one mistake: including

the Trail Blazers instead of the Jazz. Of the 12 competing methods, the median rank, the Markov-chain-based methods, and RRA performed worse than the others by making several mistakes. The results of the other methods were similar to those of Deng et al. (2014), as they made the same predictions for the top 15 teams.

Next, we examined the qualities of the rankings given by different groups. From Figure 5, it is observed that the MLE of the  $\omega$  of the professional and avid fan groups (except  $S_5$ ) was 1, much larger than the values for other groups, indicating that their rankings indeed had better quality.  $S_5$  was only accurate in predicting the ranks of a few top teams; thus, its estimated  $\omega$  was not as large as that of the other avid fans. The means of  $\omega$  in different groups appeared to be consistent with what their group label implies. In terms of ranking stability, the MLE of  $\alpha$  of the professional and avid fan groups were smaller compared with the other three groups, suggesting that they were more stable.

For the specific ranks of teams, there were a few disagreements between the consensus ranking of HEMM and that of the other methods. For instance, most of the aggregation methods ranked the “Lakers” as the second best team, whereas HEMM ranked the “Thunder” as the second best team. This was in accordance with the professional and avid fan groups, who tended to rank the “Thunder” above the “Lakers.”

Table 1: Rankings of the 30 NBA teams collected in the study by Deng et al.(2014)

| N.o. | Team         | Professionals |       |       |       |       |       | Aavid Fans |       |       |       |       |       | Fans  |       |       |          |          |          | Infrequent watchers |          |          |          |          |          | Non-interested individuals |          |          |          |          |          |          |          |          |          |   |
|------|--------------|---------------|-------|-------|-------|-------|-------|------------|-------|-------|-------|-------|-------|-------|-------|-------|----------|----------|----------|---------------------|----------|----------|----------|----------|----------|----------------------------|----------|----------|----------|----------|----------|----------|----------|----------|----------|---|
|      |              | $P_1$         | $P_2$ | $P_3$ | $P_4$ | $P_5$ | $P_6$ | $S_1$      | $S_2$ | $S_3$ | $S_4$ | $S_5$ | $S_6$ | $S_7$ | $S_8$ | $S_9$ | $S_{10}$ | $S_{11}$ | $S_{12}$ | $S_{13}$            | $S_{14}$ | $S_{15}$ | $S_{16}$ | $S_{17}$ | $S_{18}$ | $S_{19}$                   | $S_{20}$ | $S_{21}$ | $S_{22}$ | $S_{23}$ | $S_{24}$ | $S_{25}$ | $S_{26}$ | $S_{27}$ | $S_{28}$ |   |
| 1    | Heat         | 1             | 2     | 1     | 1     | 1     | 1     | 1          | 1     | 2     | 3     | 1     | 3     | -     | 1     | 2     | 1        | 3        | 1        | 3                   | 1        | 4        | 1        | 4        | 2        | 1                          | 2        | -        | 4        | -        | -        | 1        | 1        | 1        | 2        |   |
| 2    | Thunder      | 3             | 3     | 2     | 3     | 2     | 3     | 2          | 2     | -     | 2     | -     | 2     | -     | -     | 4     | 2        | 7        | 4        | -                   | -        | -        | 2        | -        | 2        | -                          | -        | -        | -        | -        | 2        | -        | -        | -        | -        |   |
| 3    | Spurs        | 7             | 10    | 11    | 5     | 8     | 7     | 6          | 5     | 5     | -     | 6     | -     | 6     | 5     | 4     | -        | -        | 5        | -                   | 8        | 6        | 3        | 6        | -        | -                          | -        | -        | -        | -        | -        | -        | -        | -        | -        |   |
| 4    | Celtics      | 5             | 11    | 10    | 9     | 9     | 5     | 4          | 8     | 1     | 4     | 2     | 5     | 2     | 3     | 1     | 3        | 4        | 3        | -                   | 4        | 2        | 3        | 2        | -        | 4                          | 4        | -        | 2        | -        | -        | 2        | -        | -        | -        |   |
| 5    | Clippers     | 8             | 5     | 6     | 10    | 5     | 6     | -          | 6     | -     | 8     | -     | 7     | -     | -     | -     | -        | -        | -        | -                   | -        | -        | -        | -        | -        | -                          | -        | 2        | -        | -        | -        | -        | -        | 4        | -        |   |
| 6    | Lakers       | 6             | 7     | 7     | 6     | 6     | 8     | 3          | 7     | 6     | 1     | 3     | 1     | 1     | 2     | 7     | 7        | 1        | 2        | 1                   | 2        | 1        | 4        | 5        | 1        | 3                          | 1        | 5        | 1        | -        | -        | 8        | 4        | 2        | -        |   |
| 7    | Pacers       | 14            | 13    | 14    | 14    | 13    | 12    | 8          | -     | -     | -     | -     | -     | -     | -     | -     | -        | -        | -        | -                   | -        | -        | -        | -        | -        | -                          | -        | 6        | -        | -        | -        | 5        | 8        | -        | -        |   |
| 8    | 76ers        | 15            | 16    | 13    | 15    | 15    | 15    | -          | -     | -     | -     | -     | -     | -     | 4     | -     | -        | 8        | 6        | -                   | -        | -        | -        | -        | 5        | 6                          | -        | 7        | 6        | 6        | 4        | 3        | 3        | -        | -        |   |
| 9    | Mavericks    | 2             | 1     | 3     | 2     | 4     | 4     | -          | -     | 7     | 7     | -     | 8     | -     | -     | 8     | 6        | 6        | 5        | -                   | 8        | 3        | -        | 1        | -        | -                          | -        | 3        | -        | -        | -        | 4        | -        | 5        | -        |   |
| 10   | Bulls        | 4             | 4     | 4     | 4     | 3     | 2     | 5          | 4     | 8     | 6     | 4     | 4     | 3     | -     | 3     | -        | -        | 8        | 4                   | -        | -        | -        | -        | -        | -                          | 3        | -        | 3        | 3        | 5        | -        | 5        | -        | 1        |   |
| 11   | Knicks       | 9             | 6     | 9     | 8     | 7     | 13    | -          | 3     | 4     | -     | 5     | -     | -     | -     | -     | -        | 2        | -        | -                   | -        | -        | -        | -        | -        | 4                          | 7        | 8        | -        | 2        | 8        | -        | 7        | 7        | 6        |   |
| 12   | Grizzlies    | 10            | 8     | 8     | 7     | 11    | 10    | -          | -     | -     | -     | -     | -     | -     | -     | -     | -        | -        | -        | -                   | -        | -        | -        | -        | -        | -                          | -        | -        | -        | 8        | -        | -        | -        | -        | -        |   |
| 13   | Nuggets      | 19            | 9     | 5     | 13    | 10    | 9     | -          | -     | -     | 8     | -     | -     | -     | -     | -     | -        | -        | -        | -                   | -        | -        | -        | 7        | -        | -                          | -        | -        | -        | -        | -        | -        | -        | 8        | -        | - |
| 14   | Magic        | 11            | 12    | 17    | 11    | 14    | 11    | -          | -     | -     | -     | -     | -     | 6     | -     | -     | -        | -        | -        | -                   | 5        | -        | -        | -        | -        | 5                          | -        | 4        | -        | -        | -        | 6        | 6        | -        | -        |   |
| 15   | Hawks        | 12            | 18    | 12    | 18    | 12    | 18    | 7          | -     | -     | -     | -     | -     | -     | -     | 5     | -        | -        | -        | -                   | -        | -        | -        | -        | -        | 8                          | 7        | -        | -        | 5        | -        | -        | -        | 8        | -        |   |
| 16   | Jazz         | 18            | 23    | 26    | 27    | 28    | 19    | -          | -     | -     | -     | -     | -     | 8     | -     | -     | -        | -        | -        | -                   | -        | -        | -        | -        | -        | -                          | -        | -        | -        | -        | -        | -        | -        | 3        | -        |   |
| 17   | TrailBlazers | 13            | 14    | 15    | 12    | 16    | 14    | -          | -     | -     | -     | -     | -     | -     | -     | -     | -        | -        | -        | -                   | -        | -        | -        | -        | -        | -                          | -        | -        | -        | -        | -        | -        | -        | -        | -        |   |
| 18   | Rockets      | 21            | 15    | 16    | 16    | 17    | 17    | -          | -     | -     | -     | -     | -     | 5     | 7     | 6     | -        | -        | 2        | 6                   | -        | -        | -        | 3        | -        | 5                          | -        | 5        | -        | 3        | -        | -        | -        | 7        | -        |   |
| 19   | Bucks        | 16            | 17    | 20    | 17    | 20    | 16    | -          | -     | -     | -     | -     | -     | -     | -     | -     | -        | -        | -        | 3                   | -        | -        | -        | -        | -        | -                          | -        | -        | -        | -        | -        | 6        | -        | -        | -        |   |
| 20   | Suns         | 20            | 22    | 19    | 21    | 19    | 21    | -          | -     | -     | -     | -     | -     | -     | 8     | -     | -        | -        | -        | 7                   | 7        | 6        | 8        | 8        | -        | -                          | -        | -        | -        | -        | -        | 7        | -        | -        | -        |   |
| 21   | Nets         | 17            | 19    | 24    | 20    | 24    | 23    | -          | -     | -     | -     | -     | -     | -     | -     | -     | 5        | -        | -        | -                   | -        | -        | -        | -        | -        | -                          | -        | -        | 7        | -        | -        | -        | 3        | 5        | -        |   |
| 22   | Warriors     | 22            | 21    | 23    | 19    | 22    | 20    | -          | -     | -     | 6     | -     | -     | -     | -     | -     | -        | -        | 6        | -                   | -        | -        | -        | -        | -        | -                          | 1        | -        | -        | -        | -        | -        | -        | -        | -        |   |
| 23   | Timberwolves | 23            | 20    | 22    | 22    | 23    | 24    | -          | -     | -     | -     | -     | -     | -     | -     | -     | -        | -        | -        | -                   | -        | 7        | 7        | -        | -        | -                          | -        | -        | -        | 4        | 7        | -        | -        | -        | 4        |   |
| 24   | Hornets      | 27            | 28    | 18    | 23    | 18    | 25    | -          | -     | -     | -     | -     | -     | 7     | -     | -     | -        | -        | -        | -                   | -        | -        | -        | -        | -        | -                          | -        | -        | -        | -        | -        | -        | -        | -        | -        |   |
| 25   | Pistons      | 25            | 25    | 25    | 24    | 25    | 22    | -          | -     | -     | -     | -     | -     | -     | -     | -     | -        | -        | -        | -                   | -        | -        | -        | 8        | -        | -                          | -        | -        | 8        | -        | -        | 2        | -        | -        | -        |   |
| 26   | Kings        | 29            | 24    | 21    | 26    | 21    | 26    | -          | -     | -     | -     | -     | -     | 4     | 5     | -     | -        | -        | 8        | -                   | 5        | 5        | -        | -        | -        | -                          | -        | -        | -        | 1        | -        | -        | -        | -        | -        |   |
| 27   | Wizards      | 28            | 27    | 28    | 25    | 27    | 27    | -          | -     | -     | 7     | -     | -     | -     | -     | -     | -        | -        | -        | -                   | -        | -        | -        | 7        | -        | -                          | -        | -        | 7        | -        | -        | -        | -        | 6        | -        | - |
| 28   | Raptors      | 24            | 26    | 29    | 28    | 30    | 28    | -          | -     | -     | -     | -     | -     | -     | -     | -     | 8        | -        | -        | -                   | -        | -        | -        | -        | -        | -                          | -        | 8        | -        | 1        | -        | -        | -        | -        | -        |   |
| 29   | Cavaliers    | 26            | 29    | 27    | 29    | 26    | 29    | -          | -     | -     | -     | -     | -     | -     | -     | -     | -        | -        | 7        | -                   | -        | -        | -        | -        | -        | -                          | 6        | -        | -        | -        | -        | -        | -        | -        | -        |   |
| 30   | Bobcats      | 30            | 30    | 30    | 30    | 29    | 30    | -          | -     | -     | -     | -     | -     | -     | -     | -     | -        | -        | -        | -                   | -        | -        | -        | 6        | -        | -                          | -        | -        | -        | -        | -        | -        | -        | -        | -        | - |



Table 2: Results of different rank aggregation methods in the NBA teams study.

| N.o. | Team         | Mean      | Median    | Kendall   | Spearman  | MC1       | MC2       | MC3       | RRA       | BIRRA     | MM        | EMM       | HEMM      |
|------|--------------|-----------|-----------|-----------|-----------|-----------|-----------|-----------|-----------|-----------|-----------|-----------|-----------|
| 1    | Heat         | 1         | 1         | 1         | 1         | 1         | 1         | 1         | 2         | 1         | 1         | 1         | 1         |
| 2    | Thunder      | 4         | 5         | 3         | 3         | 7         | 4         | 5         | 6         | 3         | 3         | 4         | 2         |
| 3    | Spurs        | 7         | 7         | 8         | 7         | 5         | 7         | 7         | 4         | 7         | 8         | 7         | 6         |
| 4    | Celtics      | 3         | 2         | 4         | 4         | 3         | 3         | 3         | 7         | 4         | 4         | 3         | 4         |
| 5    | Clippers     | 9         | 12        | 9         | 9         | 11        | 10        | 11        | 10        | 9         | 9         | 8         | 9         |
| 6    | Lakers       | 2         | 3         | 2         | 2         | 2         | 2         | 2         | 5         | 2         | 2         | 2         | 3         |
| 7    | Pacers       | 15        | <b>22</b> | 16        | 13        | <b>19</b> | <b>18</b> | 15        | <b>21</b> | 14        | 16        | 14        | 13        |
| 8    | 76ers        | 10        | 14        | 10        | 15        | <b>18</b> | 9         | 9         | 9         | 13        | 10        | 16        | 15        |
| 9    | Mavericks    | 6         | 6         | 6         | 6         | 6         | 6         | 6         | 3         | 6         | 6         | 5         | 7         |
| 10   | Bulls        | 5         | 4         | 5         | 5         | 4         | 5         | 4         | 1         | 5         | 5         | 6         | 5         |
| 11   | Knicks       | 8         | <b>24</b> | 7         | 8         | 10        | 8         | 8         | 8         | 8         | 7         | 9         | 8         |
| 12   | Grizzlies    | 11        | 10        | 11        | 10        | <b>21</b> | 12        | <b>17</b> | <b>20</b> | 10        | 15        | 11        | 10        |
| 13   | Nuggets      | 14        | 16        | 14        | 11        | <b>25</b> | 16        | 14        | <b>17</b> | 12        | 13        | 10        | 11        |
| 14   | Magic        | 12        | <b>27</b> | 12        | 12        | 9         | 11        | 12        | 11        | 11        | 12        | 12        | 12        |
| 15   | Hawks        | 16        | <b>18</b> | 15        | 16        | <b>20</b> | <b>20</b> | 13        | 15        | 16        | 14        | 13        | 16        |
| 16   | Jazz         | <b>24</b> | <b>17</b> | <b>25</b> | <b>23</b> | <b>22</b> | <b>30</b> | <b>27</b> | <b>29</b> | <b>24</b> | <b>25</b> | <b>26</b> | <b>24</b> |
| 17   | TrailBlazers | 17        | 8         | 18        | 14        | 30        | 19        | 23        | 30        | 15        | 18        | 15        | 14        |
| 18   | Rockets      | 13        | 23        | 13        | 17        | 8         | 15        | 10        | 12        | 17        | 11        | 17        | 17        |
| 19   | Bucks        | 18        | 28        | 19        | 18        | 17        | 27        | 21        | 25        | 18        | 19        | 18        | 18        |
| 20   | Suns         | 19        | 26        | 17        | 19        | 24        | 26        | 16        | 13        | 19        | 17        | 19        | 19        |
| 21   | Nets         | 20        | 30        | 23        | 20        | 16        | 17        | 20        | 19        | 20        | 23        | 21        | 21        |
| 22   | Warriors     | 21        | 29        | 20        | 21        | 15        | 23        | 22        | 22        | 21        | 22        | 20        | 20        |
| 23   | Timberwolves | 22        | 11        | 22        | 22        | 14        | 14        | 19        | 16        | 22        | 21        | 22        | 22        |
| 24   | Hornets      | 26        | 19        | 26        | 26        | 28        | 25        | 28        | 28        | 25        | 26        | 24        | 23        |
| 25   | Pistons      | 25        | 25        | 24        | 25        | 23        | 21        | 24        | 26        | 26        | 24        | 23        | 25        |
| 26   | Kings        | 23        | 20        | 21        | 24        | 12        | 13        | 18        | 14        | 23        | 20        | 25        | 26        |
| 27   | Wizards      | 27        | 21        | 27        | 27        | 26        | 28        | 25        | 18        | 29        | 27        | 27        | 27        |
| 28   | Raptors      | 28        | 13        | 28        | 28        | 13        | 22        | 26        | 27        | 27        | 28        | 28        | 28        |
| 29   | Cavaliers    | 29        | 15        | 29        | 29        | 27        | 29        | 29        | 23        | 28        | 29        | 29        | 29        |
| 30   | Bobcats      | 30        | 9         | 30        | 30        | 29        | 24        | 30        | 24        | 30        | 30        | 30        | 30        |

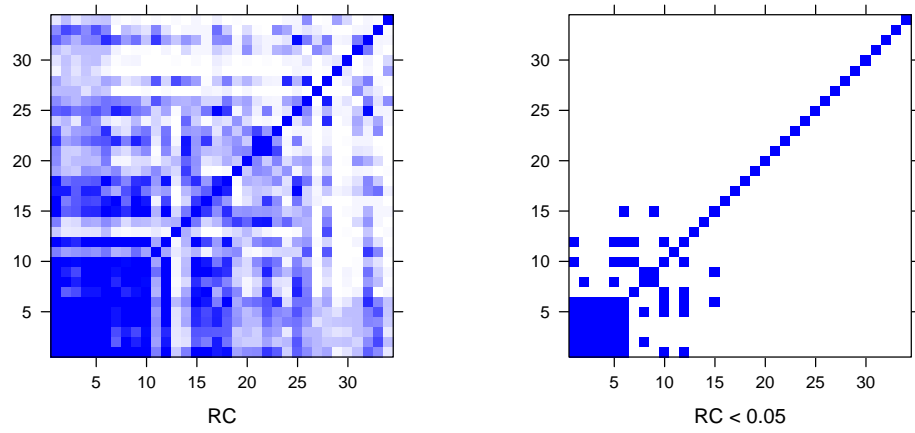

Figure 4: Correlation matrix of the NBA team rankings using the rank coefficient statistic.

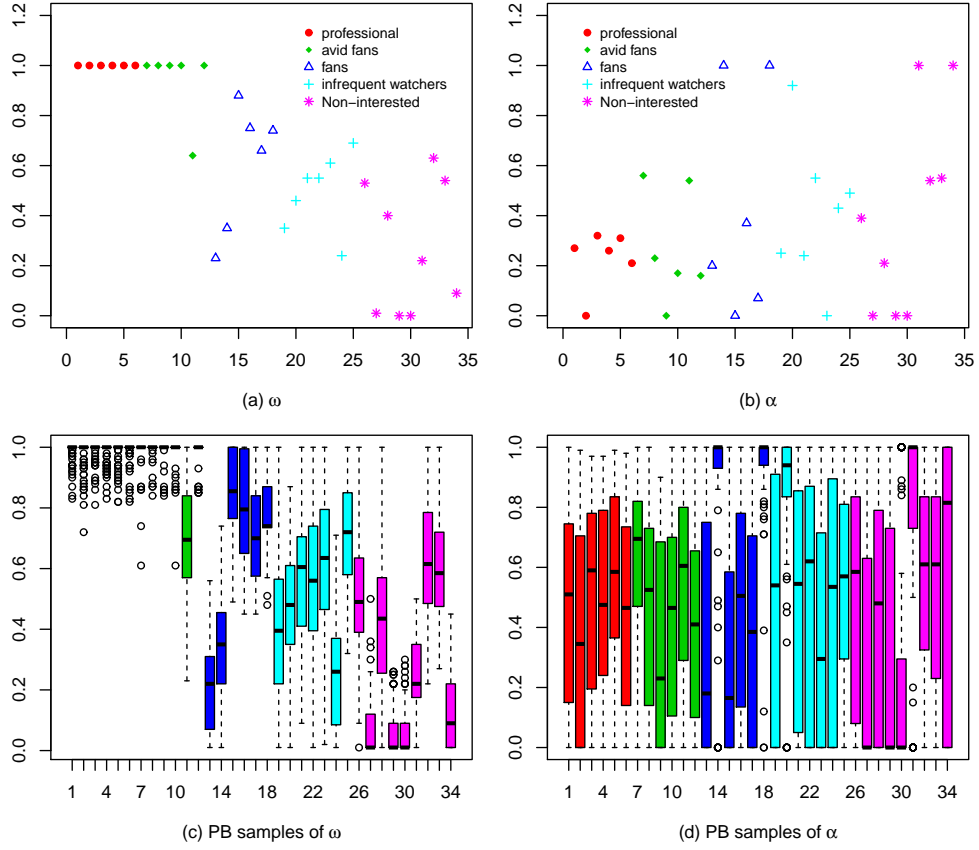

Figure 5: The MLE of the parameters from the real data (top) and parametric bootstrap samples (bottom) in the NBA team study.
