# Supplementary material
Source: publisher figshare collection journal article supplement (https://tandf.figshare.com/articles/dataset/_/7756820)
Supplement: Supplementary file 3 [file 2]

Archive with 4 entries (4 files):
- ExtMallows_0.1.0.tar.gz
- Supplementary Materials_More Studies.pdf
- instruction manual.pdf
- readme.txt
