# Supplementary material
Source: publisher figshare collection journal article supplement (https://tandf.figshare.com/articles/dataset/_/7756820)
Supplement: Supplementary file 3 [file 2 › readme.txt]

Supplemenary Materials_More Studies.pdf:   Supplementary Materials (more examples and tables)
ExtMallows_0.1.0.tar.gz:   the R package 
instruction manual.pdf:  the manual of the R package
